# Supplementary material
Source: PubMed Central journal article supplement (PMC3065306)

**Supplementary information**

**Figure S1. Generation of PKA deletion and over-expression mutants.** (A) Deletion of *pkaC2*. The *pkaC2* ORF was replaced with the phleomycin resistance cassette (PHLEO) via the split marker method. Southern blot analysis of BamHI-digested genomic DNA revealed the loss of the WT 1.48 Kb band, consistent with *pkaC2* deletion. Several clones demonstrated addition ectopic integrations and were not used for further analyses. Black rectangle represents the probe. (B) Deletion of *pkaC1*. The *pkaC1* ORF was replaced with the hygromycin resistance cassette (HYG) in both the WT and  $\Delta pkaC2$  strains. Southern Blot analysis of PstI digested genomic DNA identified the expected 4.14 Kb band in WT (left blot) or  $\Delta pkaC2$  (right blot), which was truncated in  $\Delta pkaC1$  or  $\Delta pkaC1\Delta pkaC2$  mutants. Black rectangle represents the probe. (C) Over-expression of *pkaC2*. The *pkaC1* mutant was transformed with a construct that placed *pkaC2* under control of the *gpdA* promoter. RT-PCR revealed a large increase in the steady-state mRNA levels of *pkaC2* in the  $\Delta pkaC1::PgpdA-pkaC2$  transformants relative to either the WT or the  $\Delta pkaC1$  parental strain. The upper band in the  $\Delta pkaC1::PgpdA-pkaC2$  lane corresponds to unspliced transcript. qRT-PCR confirmed the over-expression (right).

**Figure S2. Trehalose assay.** Conidia were harvested from AMM plates cultured at 37°C and then adjusted to equivalent densities with dH<sub>2</sub>O. Conidial suspensions were then incubated at 100 °C for twenty minutes and lysate supernatants were incubated with trehalase overnight at 37°C. Following trehalase incubations, samples were assayed for the presence of glucose (Sigma, GAHK20). Data represent mean glucose concentrations in each sample, following subtraction of respective no-trehalase controls. Error bars represent the  $\pm$  SD of a triplicate experiment. No statistical difference in glucose was detected between any of the strains.

**Figure S3. Hypersensitivity of the PKA mutants to SDS.** Conidia were point inoculated into wells that contained increasing concentrations of SDS in AMM agar. Plates were incubated at 37°C for 3 d.

**Figure S4. Growth and virulence phenotypes of additional  $\Delta pkaC1\Delta pkaC2$  isolates.** (A) Radial growth rates of several  $\Delta pkaC1\Delta pkaC2$  isolates compared to the growth rate of the  $\Delta pkaC1$  strain. The data represent changes in colony diameter between 24 and 48 h incubation on AMM medium at 37°C. Error bars represent the  $\pm$  SD of a triplicate experiment. (B) CF-1 mice were immunosuppressed with triamcinolone acetonide and inoculated intranasally with  $10^5$  conidia. Mortality of mice infected with two additional  $\Delta pkaC1\Delta pkaC1$  isolates was indistinguishable from saline controls.

**Figure S5. Histopathology of infected mice at 48 h post-infection.** Fungal lesions with associated neutrophilic infiltration are observed in all groups. Notably, sparse fungal growth could be seen in  $\Delta pkaC1\Delta pkaC2$  infected mice.

**Figure S6. Expression of *ags3*.** qRT-PCR was used to measure message levels of the transcript for *ags3* in the WT and the  $\Delta pkaC1$  mutant. The primer pair is that described by Ejzykowicz, et al., 2009, and is given in Table 1.

**Figure S7. *In vitro* phosphorylation of the PKA substrate kemptide.** Conidia of the indicated strains were shaken in YG at 37°C overnight. Total protein was isolated by crushing the mycelium in liquid nitrogen and suspending the lysate in extraction buffer [25 mM Tris-HCl, 1 mM EDTA, 1 mM DTT, 50 mM calyculin A phosphatase inhibitor (Invitrogen), protease inhibitor cocktail (Sigma, Cat.# P2714)]. Protein concentrations were determined by the BCA assay. Equivalent protein amounts were tested for the ability to phosphorylate kemptide

(Invitrogen Kit, Cat.#V5340). Phosphorylated substrate migrates towards the anode (bottom), while non-phosphorylated substrate migrates towards the cathode (top).

**Table 1. Oligonucleotides used in this study**

| <b>Primer</b> | <b>Description</b>      | <b>Sequence (5'-3')</b>                       |
|---------------|-------------------------|-----------------------------------------------|
| 101           | <i>pkaC2</i> LA F       | GTTTGCAGTTTTTCACCCCGC                         |
| 102           | <i>pkaC2</i> LA R       | GTCGTGACTGGGAAAACCCTGGCGTCGAGCACAGCGGGGAATG   |
| 103           | <i>pkaC2</i> RA F       | TCCTGTGTGAAATTGTTATCCGCTGCTCCTGCCACGACGTTACG  |
| 104           | <i>pkaC2</i> RA R       | AGTTTCAGTCCTGGTGTGG                           |
| 398           | M13F-PHL F              | CGCCAGGGTTTTCCAGTCACGACAAGTGGAAAGGCTGGTGTGC   |
| 408           | PHL R                   | TGCTCGCCGATCTCGGTCAT                          |
| 410           | LEO F                   | GACAAGGTCGTTGCGTCAGTC                         |
| 409           | LEO R                   | AGCGGATAACAATTTACACACAGGATTAAGCCTTCGAGCGTCC   |
| 109           | <i>pkaC2</i> probe F    | CTTTGTGAACTTGTCTTTCGCG                        |
| 110           | <i>pkaC2</i> probe R    | TTCCATTTTCGGATGCGTGC                          |
| 105           | <i>pkaC1</i> LA F       | ATGAAGTCACCAAGCTAGAGG                         |
| 106           | <i>pkaC1</i> LA R       | GTCGTGACTGGGAAAACCCTGGCGGAGGAAACGAGAGTTAAAAG  |
| 107           | <i>pkaC1</i> RA F       | TCCTGTGTGAAATTGTTATCCGCTCGACATTTGATAGAGCAATG  |
| 108           | <i>pkaC1</i> RA R       | TCCTCCGCCGAACACACGTG                          |
| 395           | HY R                    | CTCCATAACAAGCCAACCACGG                        |
| 396           | YG F                    | CGTTGCAAGACCTGCCTGAA                          |
| 399           | YG R                    | AGCGGATAACAATTTACACACAGGATCGCGTGGAGCCAAGAGCGG |
| 201           | <i>PgpdA-pkaC2</i> LA F | CTGTTTTCTTATCCCTTTCG                          |
| 202           | <i>PgpdA-pkaC2</i> LA R | GCACACCAGCCTTCCACTTGCAAGCACATCATTGATTTCG      |
| 203           | <i>gpdA</i> promoter F  | CGAATCAATGATGTGCTTGCAAGTGGAAAGGCTGGTGTGC      |
| 204           | <i>gpdA</i> promoter R  | CCTTTCCTGTAGCCATTGGGAACGGCACTGGTCAACTTGG      |
| 205           | <i>PgpdA-pkaC2</i> RA F | CCAAGTTGACCAGTGCCGTTCCAATGGCTACAGGAAAGG       |
| 206           | <i>PgpdA-pkaC2</i> RA R | GAATCACTGCCTTAGAAATC                          |
| 501           | <i>gpdA</i> qPCR F      | AGATCAAGCAGGCCATCAAG                          |
| 502           | <i>gpdA</i> qPCR R      | GTAACCCCACTCGTTGTCGT                          |
| 503           | <i>pdbA</i> qPCR F      | ATCCTGGGTGAAGAGGTTGC                          |
| 504           | <i>pdbA</i> qPCR R      | GAAGGTCATAAACTCGCAGATAGG                      |
| 505           | <i>pkaC2</i> qPCR F     | TGAGGTCATCCACAACAGCG                          |
| 506           | <i>pkaC2</i> qPCR R     | CTCACTCGGATTGGTCTTGC                          |
| 507           | <i>gpdA</i> RT-PCR F    | TCATCAACGACAAGTTCGGC                          |
| 508           | <i>gpdA</i> RT-PCR R    | ACAACACGGCGAGAGTAACC                          |
| 509           | <i>pkaC2</i> RT-PCR F   | AACAGAGCCTATATATGCTG                          |
| 510           | <i>pkaC2</i> RT-PCR R   | TGGATGACCTCAGGAGCTAG                          |
| 575           | <i>ags3</i> RT-PCR F    | CTTTGGAAGATGGTCCTGGT                          |
| 576           | <i>ags3</i> RT-PCR R    | ACAAATCTATCGGCCTCCAC                          |

A

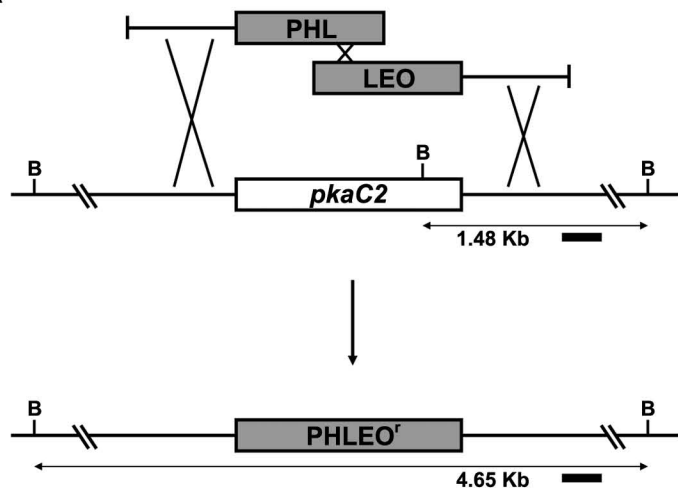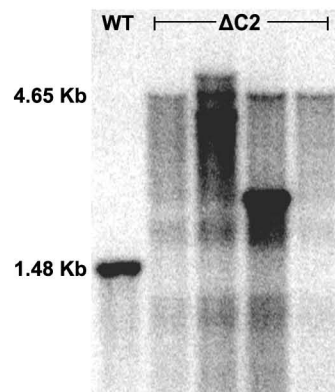

B

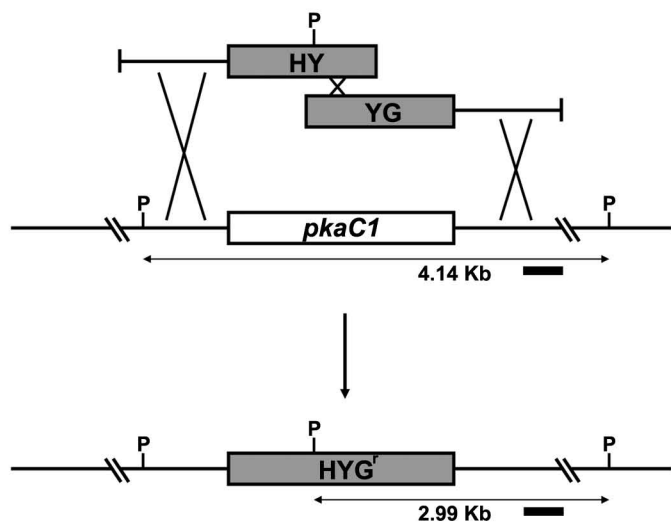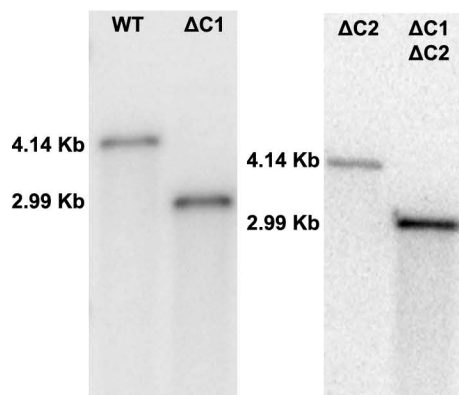

C

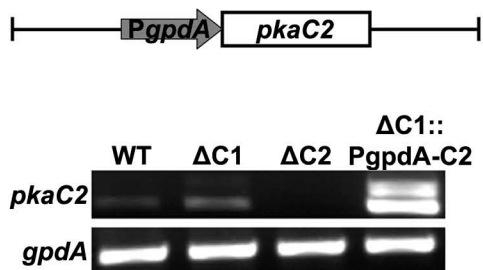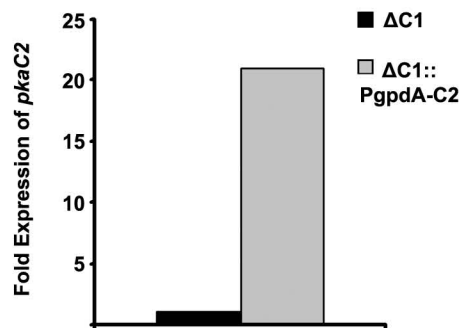

## Trehalose Assay

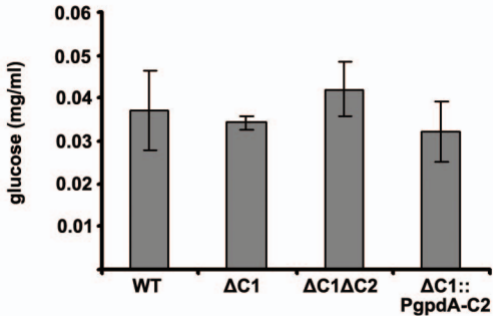

# SDS

0 .005 .0075 .010 .0125 .015 %

WT

$\Delta C2$

$\Delta C1$

$\Delta C1$   
 $\Delta C2$

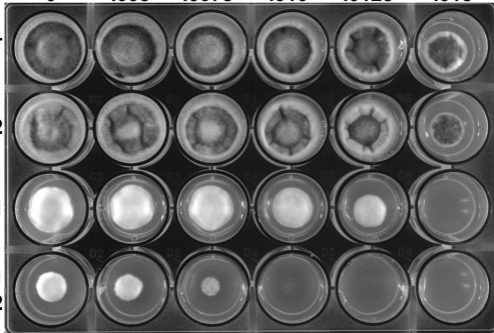

A

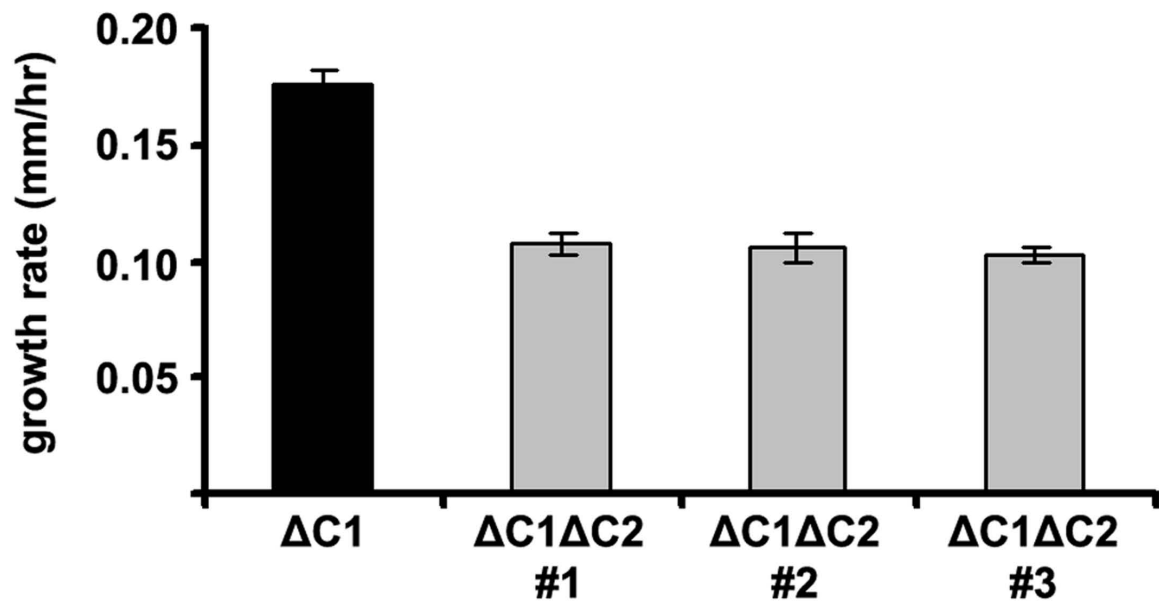

B

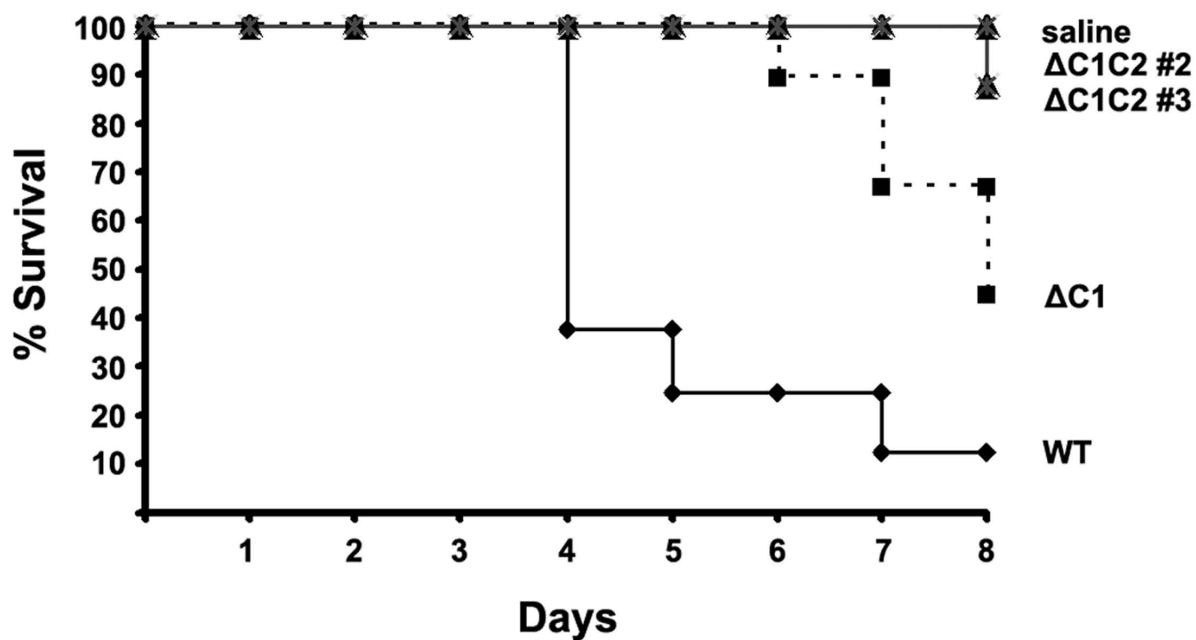



**GMS**

**H&E**

**WT**

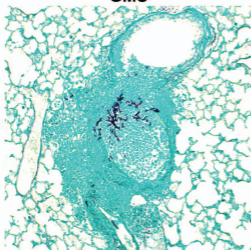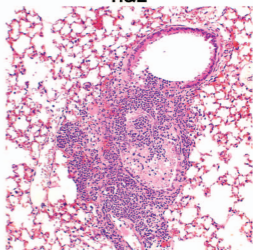

**$\Delta C1$**

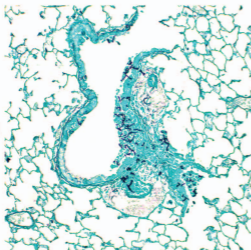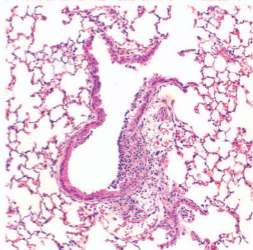

**$\Delta C1::$   
PgpdA-C2**

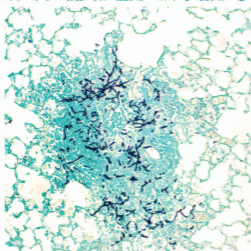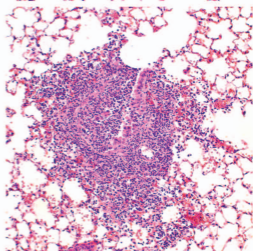

**$\Delta C1\Delta C2$**

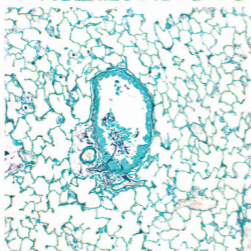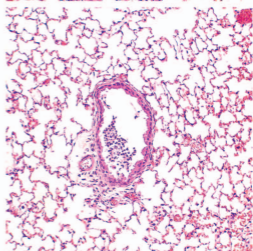

## ags3 expression

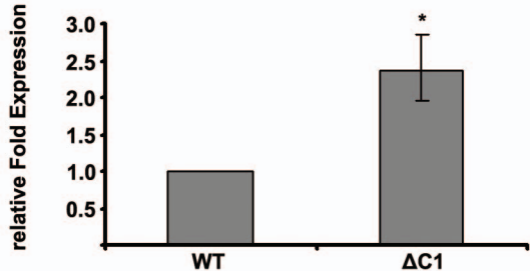

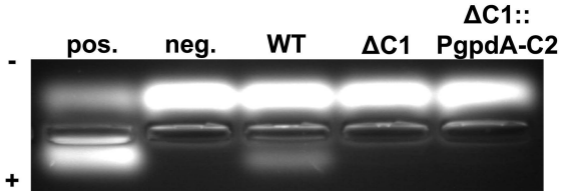

Supplement: NIHMS272407-supplement-Figures_and_Table.pdf [file NIHMS272407-supplement-Figures_and_Table.pdf]
